# Supplementary material for: A Novel Zein-Based Composite Nanoparticles for Improving Bioaccessibility and Anti-Inflammatory Activity of Resveratrol
Source: MDPI journal article supplement (doi:10.3390/foods10112773), 2021-11-11
Supplement: s1 [file s1]

## Supplementary Materials

# **A Novel Zein-Based Composite Nanoparticles for Improving Bioaccessibility and Anti-Inflammatory Activity of Resveratrol**

**Liu Jiaping <sup>1</sup>, Zhang Yaqiong <sup>1,2,\*</sup>, Liu Wenwen <sup>1</sup>, Gao Boyan <sup>1</sup> and Yu Liangli (Lucy) <sup>3</sup>**

<sup>1</sup> Institute of Food and Nutraceutical Science, School of Agriculture and Biology, Shanghai Jiao Tong University, Shanghai 200240, China;

<sup>2</sup> China-Canada Joint Lab of Food Nutrition and Health (Beijing), Beijing Technology & Business University (BTBU), Beijing 100048, China;

<sup>3</sup> Department of Nutrition and Food Science, University of Maryland, College Park, MD 20742, United States;

\* Correspondence: yqzhang2006@sjtu.edu.cn; Tel.: 021-34204538

**Table S1.** Peak assignments of Res, physical mixtures of Res and zein-MSC NPs and Res-zein-MSC NPs in FTIR spectra.

| Res<br>(cm <sup>-1</sup> ) | Physical mixtures of<br>Res and zein-MSC<br>NPs (cm <sup>-1</sup> ) | Res-zein-MSC NPs<br>(cm <sup>-1</sup> ) | Peak assignments*               |
|----------------------------|---------------------------------------------------------------------|-----------------------------------------|---------------------------------|
| 1604.56                    | 1605.16                                                             | -                                       | v(aromatic -C-C-)               |
| 1582.75                    | 1583.11                                                             | -                                       | v(olefinic -C=C-)               |
| 1509.41                    | 1509.30                                                             | -                                       | v(aromatic ring -<br>C=C-)      |
| 1461.52                    | 1461.49                                                             | -                                       | v(benzene ring)                 |
| 1440.28                    | 1440.83                                                             | 1447.89                                 | v(aromatic ring -<br>C=C-)      |
| 1379.63                    | 1380.11                                                             | -                                       | v(-C-O-)                        |
| 1322.62                    | 1322.44                                                             | -                                       | δ(=C-H)                         |
| 1143.93                    | 1144.74                                                             | -                                       | v(Phenolic -C-O-)               |
| 1008.82                    | 1008.98                                                             | -                                       | δ(trans olefinic H-<br>C=C-H)   |
| 986.17                     | 986.51                                                              | -                                       | δ(trans olefinic H-<br>C=C-H)   |
| 963.71                     | 964.18                                                              | -                                       | v(trans olefinic -<br>C=C- )    |
| 828.09                     | 828.86                                                              | -                                       | δ(=C-H of phenolic<br>ring)     |
| 673.30                     | 673.70                                                              | -                                       | δ(=C-H of trans<br>double bond) |
| 603.11                     | 603.61                                                              | -                                       | δ(=C-H of trans<br>double bond) |

\* Vibration modes: v, stretching; δ, bending.

#### Cited from:

- Davidov-Pardo, G.; Joye, I.J.; McClements, D.J. Encapsulation of resveratrol in biopolymer particles produced using liquid antisolvent precipitation. Part 1: Preparation and characterization. *Food Hydrocoll.* **2015**, 45, 309-316.
- Jangid, A.K.; Patel, K.; Jain, P.; Patel, S.; Gupta, N.; Pooja, D.; Kulharia, H. Inulin-pluronic-stearic acid based double folded nanomicelles for pH-responsive delivery of resveratrol. *Carbohydr. Polym.* **2020**, 247, 116730.
- Khan, M.A.; Yue, C.; Fang, Z.; Hu, S.; Cheng, H.; Bakry, A.M.; Liang, L. Alginate/chitosan-coated zein nanoparticles for the delivery of resveratrol. *J. Food Eng.* **2019**, 258, 45-53.
- Porto, I.C.C.M.; Nascimento, T.G.; Oliveira, J.M.S.; Freitas, P.H.; Haimeur, A.; França, R. Use of polyphenols as a strategy to prevent bond degradation in the dentin-resin interface. *Eur. J. Oral Sci.* **2018**, 126, 146-158.
- Pushpalatha, R.; Selvamuthukumar, S.; Kilimozhi, D. Carbonyl and carboxylate crosslinked cyclodextrin as a nanocarrier for resveratrol: in silico, in vitro and in vivo evaluation. *J. Incl. Phenom. Macrocycl. Chem.* **2018**, 92, 261-272.
- Qin, L.L.; Zhao, X.Y.; He, Y.W.; Wang, H.Q.; Wei, H.J.; Zhu, Q.; Zhang, T.; Qin, Y.; Du, A. Preparation, characterization, and in vitro evaluation of resveratrol-loaded cellulose aerogel. *Materials.* **2020**, 13, 1624.
- Wei, Y.; Yu, Z.P.; Lin, K.S.; Sun, C.X.; Dai, L.; Yang, S.F.; Mao, L.k.; Yuan, F.; Gao, Y.X. Fabrication and characterization of resveratrol loaded zein-propylene glycol alginate-rhamnolipid composite nanoparticles: Physicochemical stability, formation mechanism and in vitro digestion. *Food Hydrocoll.* **2019**, 95, 336-348.

**Table S2.** The thermodynamic parameters obtained from double-logarithmic and Van't Hoff equations.

| T (K) | $K_a$<br>( $10^2 \text{ L mol}^{-1}$ ) | n      | $r^2$  | $\Delta H$<br>( $\text{KJ mol}^{-1}$ ) | $\Delta S$<br>( $\text{J mol}^{-1} \text{ K}^{-1}$ ) | $\Delta G$<br>( $\text{KJ mol}^{-1}$ ) |
|-------|----------------------------------------|--------|--------|----------------------------------------|------------------------------------------------------|----------------------------------------|
| 298   | 1.9467                                 | 0.8234 | 0.9958 |                                        |                                                      | -13.1004                               |
| 310   | 1.6391                                 | 0.7488 | 0.9929 | -14.9743                               | -6.2854                                              | -13.0249                               |
| 315   | 1.3763                                 | 0.7075 | 0.9841 |                                        |                                                      | -12.9935                               |

**Table S3.** Parameters of the fitting curve of Korsmeyer-Peppas model in the study of *in-vitro* release behavior.

| <b>Zein:Res</b><br><b>(w/w)</b> | <b>n</b> | <b>r<sup>2</sup></b> |
|---------------------------------|----------|----------------------|
| 10:1                            | 0.2575   | 0.8684               |
| 8:1                             | 0.3000   | 0.9031               |
| 6:1                             | 0.2987   | 0.9079               |
| 4:1                             | 0.3267   | 0.9288               |

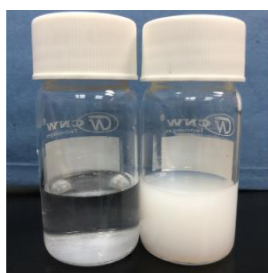

(A)

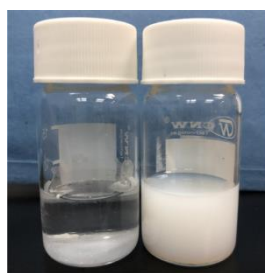

(B)

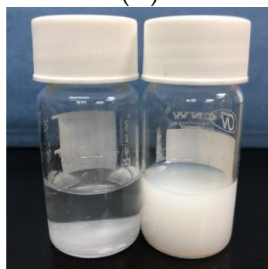

(C)

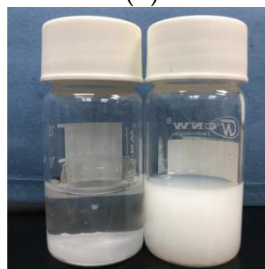

(D)

**Figure S1.** Photo images of free Res and freeze-dried Res-zein-MSC NPs (zein to Res mass ratio of 10:1 (A), 8:1 (B), 6:1 (C) and 4:1 (D)), which are dispersed in water at the same amount of Res.

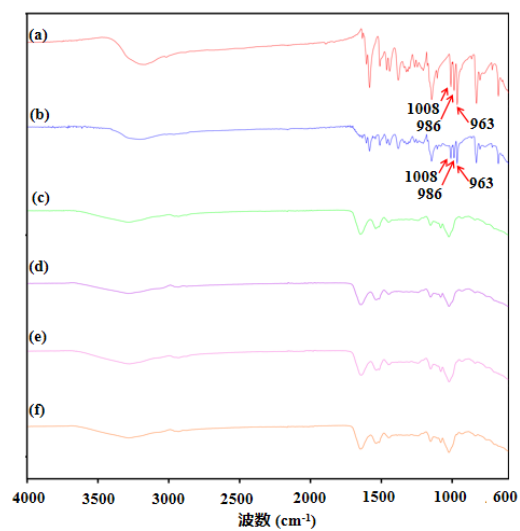

**Figure S2.** FTIR spectra for Res (a), physical mixtures of Res and zein-MSC NPs (b), and Res-zein-MSC NPs at zein to Res mass ratios of 10:1 (c), 8:1 (d), 6:1 (e) and 4:1 (f), respectively.

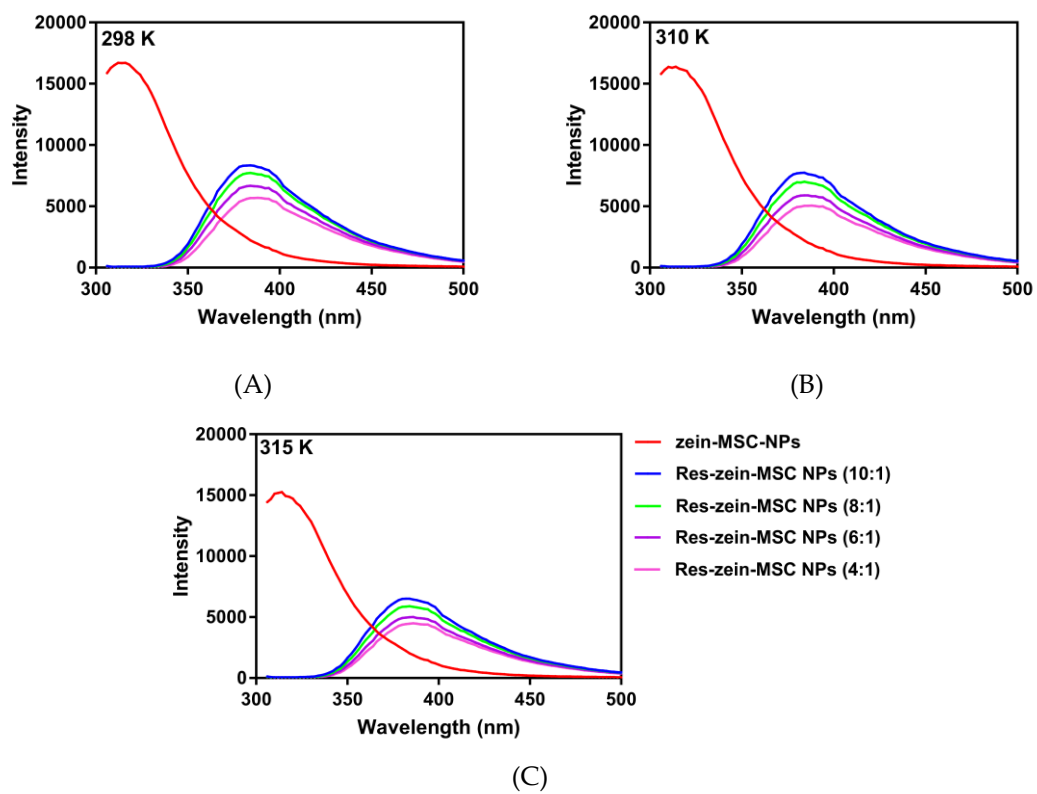

**Figure S3.** Emission fluorescence spectra for zein-MSC NPs and Res-zein-MSC NPs at 298 K (A), 310 K (B) and 315 K (C).

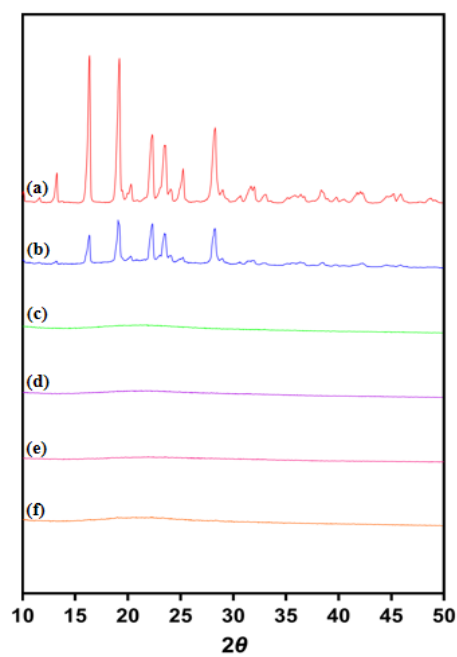

**Figure S4.** XRD spectra for Res (a), physical mixtures of Res and zein-MSC NPs (b), and Res-zein-MSC NPs at zein to Res mass ratios of 10:1 (c), 8:1 (d), 6:1 (e) and 4:1 (f), respectively.
